# Supplementary material for: Identification of a synonymous variant in TRIM59 gene for gastric cancer risk in a Chinese population
Source: PubMed Central journal article supplement (PMC5355281; doi:10.18632/oncotarget.14075), 2016-12-21
Supplement: oncotarget-08-11507-s001.pdf [file oncotarget-08-11507-s001.pdf]

## Identification of a synonymous variant in TRIM59 gene for gastric cancer risk in a Chinese population

### SUPPLEMENTARY TABLES

Supplementary Table 1: Association between TRIM59 gene polymorphisms and risk of gastric cancer (rs7629 and rs11706810)

| genotype         | Cases N (%) | Controls N (%) | Crude OR <sup>a</sup> (95% CI <sup>b</sup> ) | P value | Adjusted OR (95% CI) <sup>*</sup> | P value |
|------------------|-------------|----------------|----------------------------------------------|---------|-----------------------------------|---------|
| overall          | 602         | 868            |                                              |         |                                   |         |
| rs7629           |             |                |                                              |         |                                   |         |
| AA               | 312 (51.8)  | 437 (50.3)     | 1                                            |         | 1                                 |         |
| AG               | 248 (41.2)  | 360 (41.5)     | 0.97 (0.78-1.20)                             | 0.747   | 0.96 (0.77-1.19)                  | 0.687   |
| GG               | 42 (7.0)    | 71 (8.2)       | 0.83 (0.55-1.25)                             | 0.367   | 0.83 (0.55-1.26)                  | 0.386   |
| Dominant model   |             |                |                                              |         |                                   |         |
| AA               | 312 (51.8)  | 437 (50.3)     | 1                                            |         | 1                                 |         |
| AG + GG          | 290 (48.2)  | 431 (49.7)     | 0.94 (0.77-1.16)                             | 0.576   | 0.93 (0.76-1.15)                  | 0.520   |
| Recessive model  |             |                |                                              |         |                                   |         |
| AA + AG          | 560 (93.0)  | 797 (91.8)     | 1                                            |         |                                   |         |
| GG               | 42 (7.0)    | 71 (8.2)       | 0.84 (0.57-1.25)                             | 0.395   | 0.84 (0.56-1.26)                  | 0.400   |
| Additive model   |             |                | 0.94 (0.79-1.10)                             | 0.423   | 0.93 (0.79-1.10)                  | 0.388   |
| A                | 872 (72.4)  | 1234 (71.1)    | 1                                            |         |                                   |         |
| G                | 332 (27.6)  | 502 (28.9)     | 1.07 (0.91-1.26)                             | 0.427   |                                   |         |
| HWE <sup>c</sup> |             | 0.794          |                                              |         |                                   |         |
| rs1170680        |             |                |                                              |         |                                   |         |
| TT               | 382 (63.4)  | 532 (61.3)     | 1                                            |         | 1                                 |         |
| TC               | 187 (31.1)  | 283 (32.6)     | 0.92 (0.73-1.15)                             | 0.472   | 0.90 (0.72-1.13)                  | 0.372   |
| CC               | 33 (5.5)    | 53 (6.1)       | 0.87 (0.55-1.37)                             | 0.538   | 0.84 (0.53-1.34)                  | 0.464   |
| Dominant model   |             |                |                                              |         |                                   |         |
| TT               | 382 (63.4)  | 532 (61.3)     | 1                                            |         | 1                                 |         |
| TC + CC          | 220 (36.6)  | 236 (38.7)     | 0.91 (0.74-1.13)                             | 0.400   | 0.89 (0.72-1.11)                  | 0.293   |
| Recessive model  |             |                |                                              |         |                                   |         |
| TT + TC          | 569 (94.5)  | 815 (93.9)     | 1                                            |         |                                   |         |
| CC               | 33 (5.5)    | 53 (6.1)       | 0.89 (0.57-1.40)                             | 0.616   | 0.88 (0.56-1.38)                  | 0.580   |
| Additive model   |             |                | 0.93 (0.78-1.10)                             | 0.383   | 0.91 (0.76-1.08)                  | 0.289   |
| T                | 951 (79.0)  | 1347 (77.6)    | 1                                            |         |                                   |         |
| C                | 253 (21.0)  | 389 (22.4)     | 1.09 (0.91-1.30)                             | 0.368   |                                   |         |
| HWE <sup>c</sup> |             | 0.066          |                                              |         |                                   |         |

\*Adjusted for age, sex, smoking status, residence, hypertension, and diabetes.

<sup>a</sup>OR, odds ratio.

<sup>b</sup>CI, confidence interval.

<sup>c</sup>HWE, Hardy–Weinberg expectations.

Supplementary Table 2: Stratified analyses for TRIM59 genotypes in cases and controls (rs7629 and rs11706810)

| Variable        | n GA+AA (%) / n GG (%) for rs7629     |                       | Allelic odds ratios and 95% confidence intervals for rs7629     |         |
|-----------------|---------------------------------------|-----------------------|-----------------------------------------------------------------|---------|
|                 | Cases                                 | Controls              | Adjusted OR (95% CI)*                                           | P value |
| Age (y), median |                                       |                       |                                                                 |         |
| ≥59             | 193 (32.1)/180 (29.9)                 | 202 (23.3)/220 (25.3) | 1.03 (0.78-1.36)                                                | 0.847   |
| <59             | 97 (16.1)/132 (21.9)                  | 229 (26.4)/217 (25.0) | 0.83 (0.60-1.15)                                                | 0.267   |
| Sex             |                                       |                       |                                                                 |         |
| Females         | 78 (13.0)/86 (14.3)                   | 144 (16.6)/129 (14.9) | 0.82 (0.56-1.22)                                                | 0.338   |
| Males           | 212 (35.2)/226 (37.5)                 | 287 (33.1)/308 (35.5) | 0.99 (0.77-1.27)                                                | 0.913   |
| Smoking Status  |                                       |                       |                                                                 |         |
| Smokers         | 60 (10.0)/68 (11.3)                   | 66 (7.6)/73 (8.4)     | 0.90 (0.54-1.50)                                                | 0.689   |
| Nonsmokers      | 230 (38.2)/244 (40.5)                 | 365 (42.1)/364 (41.9) | 0.93 (0.74-1.18)                                                | 0.565   |
| Residence       |                                       |                       |                                                                 |         |
| Rural           | 171 (28.4)/187 (31.1)                 | 249 (28.7)/224 (25.8) | 0.82 (0.62-1.07)                                                | 0.168   |
| Urban           | 119 (19.8)/125 (20.8)                 | 182 (21.0)/213 (24.5) | 1.15 (0.83-1.59)                                                | 0.397   |
| Variable        | n GA+AA (%) / n GG (%) for rs11706810 |                       | Allelic odds ratios and 95% confidence intervals for rs11706810 |         |
| Age (y), median |                                       |                       |                                                                 |         |
| ≥59             | 143 (23.8)/230 (38.2)                 | 161 (18.5)/261 (30.0) | 0.92 (0.69-1.22)                                                | 0.562   |
| <59             | 77 (12.8)/152 (25.2)                  | 175 (20.2)/271 (31.2) | 0.87 (0.61-1.23)                                                | 0.419   |
| Sex             |                                       |                       |                                                                 |         |
| Females         | 59 (9.8)/105 (17.4)                   | 107 (12.3)/166 (19.1) | 0.88 (0.58-1.32)                                                | 0.523   |
| Males           | 161 (26.7)/277 (46.0)                 | 229 (26.4)/366 (42.2) | 0.91 (0.67-1.18)                                                | 0.462   |
| Smoking Status  |                                       |                       |                                                                 |         |
| Smokers         | 47 (7.8)/81 (13.5)                    | 54 (6.2)/85 (9.8)     | 0.84 (0.49-1.42)                                                | 0.510   |
| Nonsmokers      | 173 (28.7)/301 (50.0)                 | 282 (32.5)/447 (51.5) | 0.90 (0.71-1.14)                                                | 0.381   |
| Residence       |                                       |                       |                                                                 |         |
| Rural           | 136 (22.6)/222 (36.9)                 | 206 (23.7)/267 (30.8) | 0.78 (0.59-1.04)                                                | 0.090   |
| Urban           | 84 (14.0)/160 (26.6)                  | 130 (15.0)/265 (30.5) | 1.10 (0.78-1.55)                                                | 0.571   |

\*Adjusted for age, sex, smoking status, residence, hypertension, and diabetes.

**Supplementary Table 3: Associations between variant TRIM59 genotypes and clinicopathologic characteristics of gastric cancer (rs7629 and rs11706810)**

| Variable                    | AG+GG, AA for rs7629     |       | Allelic odds ratios and 95% confidence intervals for rs7629     |         |
|-----------------------------|--------------------------|-------|-----------------------------------------------------------------|---------|
|                             | AG+GG, n                 | AA, n | Adjusted OR (95%CI)*                                            | P value |
| Tumor differentiation       |                          |       |                                                                 |         |
| Well                        | 12                       | 13    | 1                                                               |         |
| Moderate                    | 64                       | 69    | 0.83 (0.33-2.05)                                                | 0.679   |
| Poor                        | 214                      | 230   | 0.95 (0.42-2.15)                                                | 0.903   |
| Depth of tumor infiltration |                          |       |                                                                 |         |
| T1                          | 46                       | 44    | 1                                                               |         |
| T2                          | 27                       | 40    | 0.60 (0.30-1.19)                                                | 0.145   |
| T3                          | 115                      | 150   | 0.75 (0.46-1.22)                                                | 0.250   |
| T4                          | 102                      | 78    | 1.29 (0.77-2.17)                                                | 0.331   |
| Lymph node metastasis       |                          |       |                                                                 |         |
| Negative                    | 92                       | 104   | 1                                                               |         |
| Positive                    | 198                      | 208   | 1.09 (0.77-1.54)                                                | 0.621   |
| Localization                |                          |       |                                                                 |         |
| Cardia                      | 133                      | 132   | 1                                                               |         |
| Noncardia                   | 157                      | 180   | 0.88 (0.64-1.23)                                                | 0.457   |
| Variable                    | TC+CC, TT for rs11706810 |       | Allelic odds ratios and 95% confidence intervals for rs11706810 |         |
|                             | TC+CC, n                 | TT, n | Adjusted OR (95%CI)*                                            | P value |
| Tumor differentiation       |                          |       |                                                                 |         |
| Well                        | 12                       | 13    | 1                                                               |         |
| Moderate                    | 49                       | 84    | 0.56 (0.23-1.39)                                                | 0.212   |
| Poor                        | 159                      | 285   | 0.57 (0.25-1.29)                                                | 0.175   |
| Depth of tumor infiltration |                          |       |                                                                 |         |
| T1                          | 35                       | 55    | 1                                                               |         |
| T2                          | 20                       | 47    | 0.67 (0.33-1.36)                                                | 0.270   |
| T3                          | 89                       | 176   | 0.82 (0.50-1.36)                                                | 0.445   |
| T4                          | 76                       | 104   | 1.15 (0.68-1.95)                                                | 0.594   |
| Lymph node metastasis       |                          |       |                                                                 |         |
| Negative                    | 71                       | 125   | 1                                                               |         |
| Positive                    | 149                      | 257   | 1.03 (0.72-1.47)                                                | 0.889   |
| Localization                |                          |       |                                                                 |         |
| Cardia                      | 103                      | 162   | 1                                                               |         |
| Noncardia                   | 117                      | 220   | 0.86 (0.61-1.21)                                                | 0.387   |

\*Adjusted for age, sex, smoking status, residence, hypertension, and diabetes.
